# Supplementary material for: Integrated Transcriptomic Analysis Reveals a Distinctive Role of YAP1 in Extramedullary Invasion and Therapeutic Sensitivity of Multiple Myeloma
Source: Front Oncol. 2022 Jan 4;11:787814. doi: 10.3389/fonc.2021.787814 (PMC8763979; doi:10.3389/fonc.2021.787814)
Supplement: Supplementary file 3 [file Table_1.xlsx]

## Sheet: Sheet1
	RFS status	OS status	RFS_time	OS_time	Gender	Age
GSM592391	0	0	93	93	female	53.4
GSM592392	0	0	96	96	female	52.7
GSM592393	0	0	87	87	male	62
GSM592394	1	0	75	98	male	60.3
GSM592395	0	1	42	43	male	66.9
GSM592396	0	0	89	90	female	55.3
GSM592397	1	0	33	95	male	57.1
GSM592398	1	1	21	38	male	55.9
GSM592399	0	0	90	91	male	54.5
GSM592400	1	0	92	95	male	59.7
GSM592401	1	1	35	87	male	46.6
GSM592402	0	1	8	8	female	75.2
GSM592403	0	0	83	84	female	45.8
GSM592404	1	0	50	94	female	55.4
GSM592405	0	1	9	10	female	52
GSM592406	1	1	22	35	female	68.9
GSM592407	0	1	20	20	male	53.6
GSM592408	1	0	77	92	male	40.2
GSM592409	0	1	29	29	female	58.2
GSM592410	1	1	52	57	male	60
GSM592411	1	1	39	45	male	56.9
GSM592412	0	0	92	92	female	43.2
GSM592413	1	1	17	27	male	68.2
GSM592414	0	0	89	89	male	63
GSM592415	1	1	43	51	male	53.4
GSM592416	1	1	18	71	male	50
GSM592417	0	1	39	39	male	64.5
GSM592418	0	1	2	2	female	38.7
GSM592419	0	0	90	90	male	42.9
GSM592420	1	1	18	30	female	58.6
GSM592421	0	0	84	84	male	70
GSM592422	0	1	44	45	male	54.7
GSM592423	0	0	85	86	male	56.3
GSM592424	1	1	21	29	female	71.5
GSM592425	1	0	64	86	female	50.3
GSM592426	0	0	81	87	male	50.2
GSM592427	0	0	89	89	female	43.2
GSM592428	1	1	20	26	male	57.1
GSM592429	0	1	30	30	male	56.3
GSM592430	1	1	37	49	female	63.4
GSM592431	0	1	76	76	female	51.1
GSM592432	1	1	46	66	male	44
GSM592433	1	1	26	41	male	61
GSM592434	1	1	16	25	female	69.4
GSM592435	0	0	51	52	male	55
GSM592436	0	0	50	51	female	66
GSM592437	0	0	51	51	male	53
GSM592438	0	0	38	96	female	63
GSM592439	0	0	47	48	male	56
GSM592440	1	1	68	78	female	57.8
GSM592441	0	0	51	52	female	57
GSM592442	0	0	50	51	male	52
GSM592443	1	0	76	80	male	60.7
GSM592444	1	0	72	84	male	54.6
GSM592445	0	0	51	51	female	53
GSM592446	0	0	51	51	male	63
GSM592447	0	0	51	54	male	55
GSM592448	0	0	49	49	male	73
GSM592449	0	0	52	52	male	60
GSM592450	0	0	46	47	female	48
GSM592451	0	1	1	2	male	70
GSM592452	1	1	4	41	male	69
GSM592453	0	0	50	51	male	54
GSM592454	1	0	25	51	male	47
GSM592455	0	0	88	88	male	59.6
GSM592456	0	0	48	49	female	32
GSM592457	0	0	49	50	male	75
GSM592458	0	1	13	14	male	61
GSM592459	0	0	49	49	female	59
GSM592460	1	0	42	50	male	49
GSM592461	0	0	48	49	male	57
GSM592462	1	1	8	9	female	52
GSM592463	0	1	21	22	male	56
GSM592464	1	1	26	44	female	53
GSM592465	0	1	15	15	male	67
GSM592466	0	0	47	49	female	58
GSM592467	0	0	45	45	female	59
GSM592468	1	0	15	88	male	46.7
GSM592469	1	1	18	20	male	64
GSM592470	0	0	49	49	male	54
GSM592471	0	0	44	49	female	50
GSM592472	0	1	15	15	female	68
GSM592473	0	0	48	49	male	47
GSM592474	0	0	45	45	male	57
GSM592475	0	0	45	48	male	61
GSM592476	0	0	48	54	male	62
GSM592477	0	0	40	47	female	58
GSM592478	0	1	5	5	female	49
GSM592479	0	0	47	48	male	61
GSM592480	0	0	47	48	female	46
GSM592481	0	0	48	49	male	67
GSM592482	0	0	50	50	female	65
GSM592483	0	0	48	49	male	74
GSM592484	1	0	43	49	male	72
GSM592485	0	0	49	49	female	68
GSM592486	0	0	49	50	male	66
GSM592487	0	0	49	49	female	49
GSM592488	0	0	47	47	male	58
GSM592489	0	1	11	12	male	72
GSM592490	0	0	46	49	male	64
GSM592491	0	0	46	47	male	45
GSM592492	0	1	6	6	female	48
GSM592493	0	0	46	48	male	68
GSM592494	1	0	42	48	male	49
GSM592495	1	1	33	55	male	57.7
GSM592496	0	0	47	48	male	66
GSM592497	1	1	20	29	female	36
GSM592498	0	0	46	47	male	67
GSM592499	0	0	45	47	male	59
GSM592500	1	1	17	21	male	45.6
GSM592501	1	1	11	42	male	67
GSM592502	0	0	46	47	male	68
GSM592503	0	0	44	45	male	50
GSM592504	1	0	32	47	male	67
GSM592505	0	0	47	47	male	66
GSM592506	0	0	45	46	male	60
GSM592507	1	0	32	48	female	46
GSM592508	0	1	34	35	female	69
GSM592509	1	1	4	8	female	55
GSM592510	1	0	68	110	male	54.3
GSM592511	0	0	46	46	female	66
GSM592512	0	0	44	46	male	56
GSM592513	0	1	37	38	male	62
GSM592514	0	0	47	49	male	61
GSM592515	1	1	38	53	male	45.9
GSM592516	0	0	44	44	male	52
GSM592517	1	0	39	91	male	59.8
GSM592518	0	0	90	90	male	65.1
GSM592519	0	1	7	7	male	69
GSM592520	0	0	45	46	male	51
GSM592521	1	0	37	46	male	67
GSM592522	0	0	40	40	male	50
GSM592523	0	0	46	47	male	71
GSM592524	1	0	41	47	female	68
GSM592525	0	1	15	15	male	64
GSM592526	1	1	26	37	male	52
GSM592527	0	0	44	45	male	65
GSM592528	1	0	35	85	male	58
GSM592529	0	0	44	45	male	63
GSM592530	1	0	26	45	male	70
GSM592531	0	0	45	47	male	61
GSM592532	1	1	10	26	male	67.2
GSM592533	0	0	43	44	female	70
GSM592534	0	0	44	44	male	54
GSM592535	1	1	5	6	female	70
GSM592536	1	1	5	6	male	74
GSM592537	0	0	42	44	male	71
GSM592538	0	0	43	44	male	38
GSM592539	0	1	36	37	male	54
GSM592540	1	0	29	38	female	49
GSM592541	0	0	43	43	male	66
GSM592542	0	1	8	8	female	64
GSM592543	0	0	87	88	male	64.9
GSM592544	0	1	33	34	female	62
GSM592545	0	0	41	42	male	58
GSM592546	0	0	43	45	male	70
GSM592547	0	0	43	45	male	67
GSM592548	0	0	42	43	female	68
GSM592549	0	0	43	44	male	42
GSM592550	0	0	37	38	male	45
GSM592551	0	0	42	43	male	59
GSM592552	0	0	41	43	male	64
GSM592553	0	0	41	42	male	67
GSM592554	0	0	42	43	male	46
GSM592555	0	0	41	42	female	39
GSM592556	0	0	42	43	male	66
GSM592557	0	0	35	36	male	72
GSM592558	0	0	41	41	male	61
GSM592559	0	0	37	38	female	47
GSM592560	0	0	43	44	male	57
GSM592561	0	0	42	42	male	61
GSM592562	0	0	41	42	male	53
GSM592563	0	0	40	40	male	42
GSM592564	0	1	13	14	male	75
GSM592565	0	1	6	6	male	69
GSM592566	0	0	41	42	female	52
GSM592567	0	1	5	5	male	68
GSM592568	0	0	39	40	female	59
GSM592569	0	0	37	38	male	47
GSM592570	0	0	39	40	male	55
GSM592571	0	0	42	43	male	56
GSM592572	0	0	89	89	male	34.2
GSM592573	0	0	40	41	female	59
GSM592574	0	0	39	40	male	58
GSM592575	0	0	40	44	male	68
GSM592576	0	0	39	40	male	57
GSM592577	0	0	40	41	male	57
GSM592578	0	0	39	39	female	61
GSM592579	0	0	39	39	female	64
GSM592580	0	0	39	40	female	45
GSM592581	0	0	39	39	male	55
GSM592582	0	0	39	40	male	53
GSM592583	0	1	5	6	female	64
GSM592584	1	1	20	24	female	54
GSM592585	0	0	39	39	male	43
GSM592586	0	0	38	38	female	51
GSM592587	0	0	38	39	female	70
GSM592588	0	0	34	37	male	49
GSM592589	0	0	34	35	female	63
GSM592590	0	0	37	38	male	70
GSM592591	0	0	37	38	female	60
GSM592592	0	0	35	36	male	54
GSM592593	0	0	84	86	female	29.7
GSM592594	0	0	37	38	male	61
GSM592595	1	0	30	38	male	66
GSM592596	0	1	7	8	male	64
GSM592597	0	0	37	38	male	71
GSM592598	0	0	37	37	female	57
GSM592599	0	0	32	33	male	43
GSM592600	0	0	37	38	male	47
GSM592601	0	0	37	38	male	59
GSM592602	0	0	38	39	male	65
GSM592603	1	1	18	20	female	65
GSM592604	1	1	25	30	female	42
GSM592605	0	0	34	36	female	55
GSM592606	0	0	36	37	female	63
GSM592607	0	0	36	40	female	54
GSM592608	0	0	38	39	male	67
GSM592609	0	1	25	26	female	61
GSM592610	0	0	33	34	female	67
GSM592611	0	0	36	36	male	49
GSM592612	0	0	35	36	female	70
GSM592613	0	0	35	36	female	66
GSM592614	0	0	34	35	male	52
GSM592615	0	0	29	40	male	65
GSM592616	0	0	33	35	female	62
GSM592617	0	0	32	34	male	48
GSM592618	0	0	34	34	male	64
GSM592619	1	1	19	24	female	62.9
GSM592620	1	0	56	85	male	44.5
GSM592621	0	0	35	35	male	56
GSM592622	0	0	34	36	female	47
GSM592623	0	0	34	34	male	65
GSM592624	0	0	32	33	female	62
GSM592625	0	0	87	87	male	48.3
GSM592626	0	0	31	32	female	62
GSM592627	0	0	30	31	male	56
GSM592628	1	1	21	44	male	64.6
GSM592629	0	0	35	36	male	66
GSM592630	0	0	34	35	male	63
GSM592631	0	0	33	34	female	60
GSM592632	0	0	35	35	male	48
GSM592633	1	1	16	21	female	56
GSM592634	1	0	30	37	female	53
GSM592635	0	0	34	35	male	54
GSM592636	1	1	12	34	female	42
GSM592637	0	0	34	36	female	59
GSM592638	0	0	35	36	female	55
GSM592639	0	0	32	33	female	61
GSM592640	0	0	33	34	male	43
GSM592641	1	1	20	31	male	53
GSM592642	1	1	2	11	male	57
GSM592643	0	0	33	33	male	73
GSM592644	0	0	33	34	male	65
GSM592645	0	0	32	33	male	73
GSM592646	0	0	32	33	female	65
GSM592647	0	0	32	33	male	65
GSM592648	0	0	32	33	female	66
GSM592649	0	0	31	32	male	50
GSM592650	0	1	12	13	female	62
GSM592651	0	0	31	31	female	45
GSM592652	0	0	30	31	male	49
GSM592653	0	0	31	31	male	37
GSM592654	0	0	31	31	male	44
GSM592655	0	0	30	31	female	53
GSM592656	1	1	56	66	male	62.6
GSM592657	0	0	31	32	male	60
GSM592658	0	1	1	2	male	71
GSM592659	0	0	30	31	male	41
GSM592660	0	0	29	30	male	59
GSM592661	0	0	28	29	male	57
GSM592662	1	1	28	52	female	49.7
GSM592663	1	0	64	89	male	64.9
GSM592664	1	1	0	9	male	43.1
GSM592665	0	1	19	19	female	38.6
GSM592666	0	1	0	1	male	55.3
GSM592667	0	0	86	86	male	61.9
GSM592668	1	1	22	24	female	52.8
GSM592669	0	1	39	40	male	45.4
GSM592670	0	1	72	72	female	68.7
GSM592671	0	0	85	85	female	46.3
GSM592672	0	1	47	47	male	52.7
GSM592673	0	0	81	116	male	46.4
GSM592674	0	0	81	82	male	54.5
GSM592675	0	0	83	94	male	54.3
GSM592676	1	1	53	81	male	39.4
GSM592677	1	0	46	83	female	57.6
GSM592678	0	1	72	77	female	41.4
GSM592679	0	0	74	74	female	51.6
GSM592680	0	0	78	78	male	53.1
GSM592681	0	0	84	84	male	58.7
GSM592682	0	1	15	15	male	64.3
GSM592683	1	0	44	84	male	44.8
GSM592684	1	0	70	84	female	54.1
GSM592685	1	1	48	74	male	64.5
GSM592686	0	0	83	83	male	67.6
GSM592687	1	1	42	55	female	67.1
GSM592688	0	1	21	22	male	52.2
GSM592689	0	1	7	10	female	64.6
GSM592690	0	1	3	3	male	44.3
GSM592691	0	1	24	24	female	69.3
GSM592692	1	1	32	55	male	49.5
GSM592693	1	0	2	84	female	39.8
GSM592694	0	0	81	81	male	54.8
GSM592695	0	1	42	42	male	66.5
GSM592696	0	0	83	83	female	70.4
GSM592697	0	1	2	2	male	52.2
GSM592698	0	1	1	2	male	56.5
GSM592699	1	0	51	72	male	61.6
GSM592700	0	1	17	28	male	48.4
GSM592701	1	1	24	38	male	53.2
GSM592702	0	1	35	36	male	55.5
GSM592703	1	1	10	12	male	59.3
GSM592704	0	0	82	82	male	73.4
GSM592705	0	0	65	82	male	69.2
GSM592706	0	0	82	82	male	53.7
GSM592707	0	0	77	82	male	55.4
GSM592708	1	0	80	84	male	74.5
GSM592709	0	0	81	81	female	52.4
GSM592710	1	0	47	82	male	68.2
GSM592711	0	1	15	16	male	58
GSM592712	1	1	33	59	female	65.7
GSM592713	1	1	11	69	male	65.1
GSM592714	1	0	63	80	male	32
GSM592715	0	0	80	82	female	58.8
GSM592716	1	0	9	81	male	50.9
GSM592717	0	0	79	80	female	63.3
GSM592718	1	1	7	55	male	62.9
GSM592719	1	0	75	82	male	52.8
GSM592720	1	0	56	79	female	68.3
GSM592721	0	0	74	78	female	64.8
GSM592722	1	1	47	58	male	56.2
GSM592723	1	0	62	81	female	60.4
GSM592724	1	0	36	96	female	55.1
GSM592725	0	1	2	3	female	76.5
GSM592726	0	0	77	85	female	51.5
GSM592727	0	1	31	34	female	63.9
GSM592728	0	1	33	35	male	40.7
GSM592729	1	1	9	16	female	63.7
GSM592730	0	0	72	74	male	68.7
GSM592731	0	1	15	18	male	61.6
GSM592732	1	1	31	41	male	71
GSM592733	1	1	42	70	female	50.6
GSM592734	0	1	3	4	male	58.9
GSM592735	0	1	11	13	male	60
GSM592736	1	1	20	54	male	45
GSM592737	1	0	61	77	male	53.7
GSM592738	0	0	73	77	female	49.3
GSM592739	0	1	62	63	female	63.1
GSM592740	0	0	76	76	female	48.7
GSM592741	0	1	21	21	male	61.5
GSM592742	1	0	45	64	female	54.5
GSM592743	1	0	37	75	female	48.1
GSM592744	1	1	9	16	male	56.3
GSM592745	0	0	74	76	female	35.9
GSM592746	0	0	75	75	male	60.7
GSM592747	0	1	19	22	male	60.2
GSM592748	1	0	53	76	male	38.9
GSM592749	0	0	75	77	male	58.5
GSM592750	1	0	41	126	female	60.7
GSM592751	0	0	74	74	male	55.5
GSM592752	0	0	63	64	male	46.6
GSM592753	0	0	0	19	male	60.7
GSM592754	1	0	36	76	female	57.8
GSM592755	0	0	73	74	female	55.2
GSM592756	0	0	66	67	female	52
GSM592757	1	1	24	33	female	60.6
GSM592758	1	1	13	31	female	60.2
GSM592759	0	0	56	73	male	48.4
GSM592760	1	0	62	76	female	47.1
GSM592761	1	1	9	47	female	69.7
GSM592762	1	1	22	58	male	48.3
GSM592763	1	1	10	13	male	39.9
GSM592764	0	0	68	72	female	67.1
GSM592765	0	0	73	74	male	60.7
GSM592766	0	1	34	35	male	57.8
GSM592767	1	0	70	74	male	59.7
GSM592768	0	0	73	73	female	48
GSM592769	0	0	72	74	female	47
GSM592770	0	0	64	66	male	52.1
GSM592771	0	0	72	74	male	41.4
GSM592772	1	1	28	62	female	54
GSM592773	0	0	72	72	male	46.1
GSM592774	1	1	33	55	male	57.4
GSM592775	1	1	17	17	female	55.2
GSM592776	1	0	29	72	male	68.4
GSM592777	1	0	10	64	male	41.7
GSM592778	0	0	71	71	female	66.7
GSM592779	0	0	71	71	female	59.2
GSM592780	0	0	47	72	male	55
GSM592781	0	0	71	71	female	53.7
GSM592782	0	0	71	71	male	55.9
GSM592783	1	0	52	71	female	49
GSM592784	1	1	41	59	male	59.2
GSM592785	1	0	33	74	female	49.8
GSM592786	0	0	69	69	female	57.3
GSM592787	1	0	52	70	male	47.8
GSM592788	0	0	70	70	female	55.8
GSM592789	0	0	69	70	female	65.4
GSM592790	0	0	69	70	female	63.1
GSM592791	0	1	36	37	male	56.4
GSM592792	1	0	48	69	female	36.1
GSM592793	0	0	70	70	female	31.8
GSM592794	0	1	41	41	female	61.7
GSM592795	0	1	7	8	female	53.5
GSM592796	0	0	60	63	female	40.7
GSM592797	0	1	10	11	female	58.9
GSM592798	1	1	19	33	female	70.9
GSM592799	0	0	68	68	male	66.4
GSM592800	0	0	69	69	male	37.2
GSM592801	0	1	5	6	male	60.8
GSM592802	0	0	63	64	female	44.3
GSM592803	1	1	7	12	male	47.6
GSM592804	1	0	47	63	male	64.7
GSM592805	0	0	68	68	male	72.5
GSM592806	0	1	5	5	male	67.2
GSM592807	0	0	67	67	male	66.4
GSM592808	1	1	26	32	male	52.1
GSM592809	1	1	35	39	male	65.6
GSM592810	1	0	43	66	male	61.2
GSM592811	0	0	63	63	male	24.8
GSM592812	0	1	5	5	male	62.8
GSM592813	0	0	65	66	female	48.2
GSM592814	0	0	65	65	female	63.1
GSM592815	1	1	0	58	male	59.9
GSM592816	0	0	65	65	female	65.6
GSM592817	0	0	65	67	male	53.1
GSM592818	0	0	65	66	male	60.6
GSM592819	0	0	65	66	male	66.9
GSM592820	0	1	37	39	female	68.2
GSM592821	0	0	60	62	male	58.4
GSM592822	1	1	48	52	female	60.4
GSM592823	0	0	65	65	male	75.9
GSM592824	0	0	61	61	female	50.9
GSM592825	1	0	25	65	male	38.4
GSM592826	1	0	50	66	male	71.2
GSM592827	0	0	65	65	male	53.8
GSM592828	0	0	63	64	male	55.2
GSM592829	1	1	18	22	male	70.9
GSM592830	0	1	23	44	male	62
GSM592831	1	0	39	65	female	69.6
GSM592832	0	0	65	65	female	65.8
GSM592833	1	0	54	65	female	64.2
GSM592834	0	0	65	65	female	67.3
GSM592835	1	0	7	64	female	64.1
GSM592836	0	0	60	60	female	49.5
GSM592837	0	0	64	64	female	39.9
GSM592838	0	0	63	64	female	66.2
GSM592839	0	1	6	7	female	70.1
GSM592840	0	0	27	28	female	48.9
GSM592841	1	0	24	63	female	64.2
GSM592842	0	1	5	6	female	59.7
GSM592843	0	0	60	62	female	48.2
GSM592844	0	0	63	63	male	53.3
GSM592845	0	0	62	63	female	42.7
GSM592846	0	0	60	63	male	44
GSM592847	0	0	61	61	female	38.5
GSM592848	0	0	63	63	male	65.4
GSM592849	0	0	61	62	female	66.5
GSM592850	0	1	47	48	female	71.7
GSM592851	0	0	57	58	female	60.5
GSM592852	0	0	60	61	female	39.8
GSM592853	0	1	36	37	male	75.9
GSM592854	1	0	51	61	female	65.5
GSM592855	0	0	61	62	male	67.5
GSM592856	0	0	61	62	female	63
GSM592857	0	0	58	59	female	59.4
GSM592858	1	1	1	60	female	61.9
GSM592859	0	0	56	56	male	57.7
GSM592860	0	1	11	12	male	45.4
GSM592861	0	0	60	61	female	60.4
GSM592862	0	0	60	61	male	60.5
GSM592863	0	0	55	57	female	43.3
GSM592864	0	0	59	60	male	55.3
GSM592865	0	0	58	59	male	58.7
GSM592866	1	0	31	60	male	49.4
GSM592867	1	0	45	62	male	53.8
GSM592868	0	0	61	62	male	66.7
GSM592869	0	1	7	8	female	56.7
GSM592870	1	0	32	61	female	58.3
GSM592871	0	1	7	7	female	59
GSM592872	1	1	23	47	male	65
GSM592873	1	1	14	15	female	73.4
GSM592874	0	0	55	56	female	51.9
GSM592875	1	0	24	57	female	42
GSM592876	0	0	58	59	female	66.8
GSM592877	0	0	60	61	female	71.1
GSM592878	0	0	59	61	male	30.5
GSM592879	1	0	45	59	female	56
GSM592880	1	0	45	60	female	73.1
GSM592881	0	0	57	58	male	43.8
GSM592882	1	1	16	26	female	54.6
GSM592883	1	1	18	38	female	49.4
GSM592884	0	0	60	61	female	55.8
GSM592885	0	0	58	59	male	68.5
GSM592886	1	1	1	44	male	40.6
GSM592887	1	1	17	37	male	45.2
GSM592888	0	0	56	56	male	49
GSM592889	0	0	57	58	male	66.5
GSM592890	1	0	35	57	male	56.3
GSM592891	0	0	56	57	male	61.8
GSM592892	0	1	22	23	female	65.8
GSM592893	0	0	56	57	male	61.8
GSM592894	1	0	29	57	male	49.7
GSM592895	1	0	26	55	male	67.2
GSM592896	1	0	10	57	male	68.8
GSM592897	0	0	50	51	female	43.8
GSM592898	1	0	37	56	male	57.4
GSM592899	0	0	56	96	female	51.6
GSM592900	0	0	54	54	male	58.1
GSM592901	1	1	10	17	male	60.6
GSM592902	0	0	54	58	male	50
GSM592903	0	0	52	55	female	47.2
GSM592904	0	0	57	58	male	56
GSM592905	0	0	55	56	female	61.5
GSM592906	0	0	58	58	female	51.4
GSM592907	0	0	53	54	female	60.5
GSM592908	0	0	54	54	male	64
GSM592909	0	1	10	10	male	63
GSM592910	0	0	56	269	male	54.3
GSM592911	0	0	55	56	male	57
GSM592912	0	0	54	54	female	48.5
GSM592913	0	0	53	55	male	53.5
GSM592914	0	0	52	52	male	65.3
GSM592915	1	1	19	24	male	56.9
GSM592916	0	0	51	51	male	60.3
GSM592917	0	0	54	54	female	68.9
GSM592918	1	1	6	10	male	45.1
GSM592919	1	0	4	54	female	43.1
GSM592920	0	0	54	54	female	69.4
GSM592921	1	0	41	53	female	73.5
GSM592922	0	1	46	46	female	58.2
GSM592923	1	0	32	55	male	40
GSM592924	0	0	51	52	female	35.8
GSM592925	1	1	25	27	male	41.9
GSM592926	1	1	13	27	male	35.2
GSM592927	0	0	52	52	female	49.9
GSM592928	0	0	52	52	male	64.6
GSM592929	0	0	52	54	male	65.8
GSM592930	0	0	52	52	male	51.1
GSM592931	0	0	50	51	female	42.1
GSM592932	0	1	3	3	female	66.4
GSM592933	0	0	57	60	male	52.1
GSM592934	0	0	52	52	male	48.2
GSM592935	1	1	34	49	male	53.6
GSM592936	0	0	52	53	female	57.6
GSM592937	1	1	32	41	male	72.5
GSM592938	1	0	32	54	male	73.7
GSM592939	1	1	10	19	male	57.3
GSM592940	0	0	53	53	male	52.1
GSM592941	0	0	53	53	female	54.1
GSM592942	0	0	53	53	male	60.9
GSM592943	1	1	17	54	male	45.2
GSM592944	0	1	12	14	female	64.9
GSM592945	0	0	52	53	male	61
GSM592946	0	0	51	52	male	53
GSM592947	0	0	50	51	female	61
GSM592948	1	1	20	30	female	61
GSM592949	0	0	51	51	male	64
